# Supplementary material
Source: ML conference proceedings conference paper supplement (https://proceedings.neurips.cc/paper_files/paper/2023/hash/72235260ae8d57ac42638a26d3b7d089-Abstract.html)
Supplement: Supplementary file 1 [file 72235260ae8d57ac42638a26d3b7d089-Supplemental-Conference.pdf]

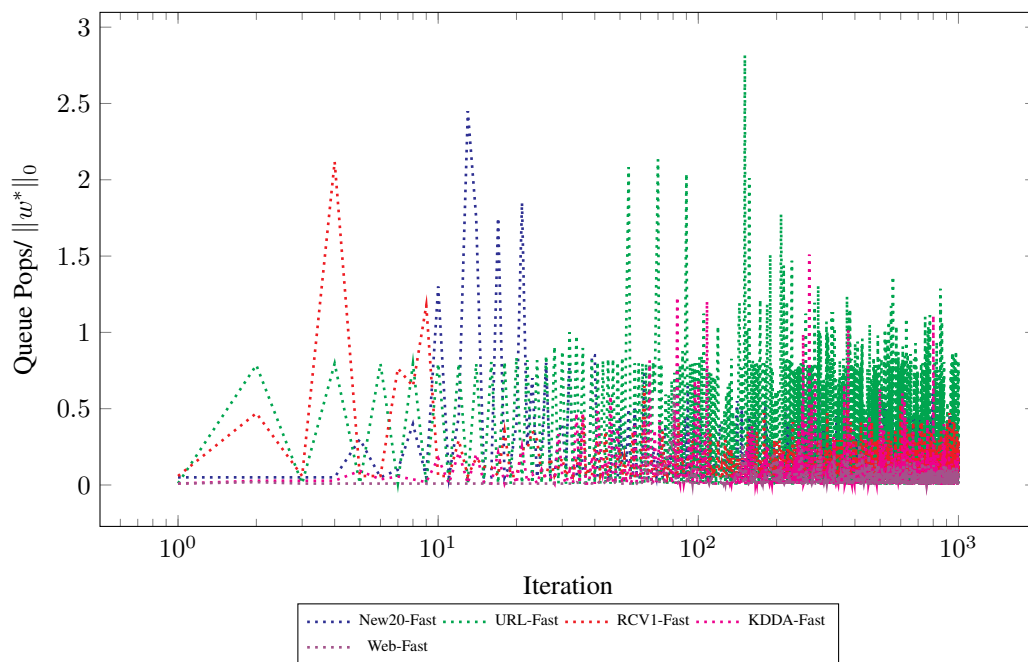

Figure 3: The ratio of items popped from a Fibonacci Heap over the non-zeros in the final solution (y-axis) over the number of iterations (x-axis) empirically demonstrates that [Algorithm 3](#) does not need to consider all  $D$  possible features to select the correct iterate.
